# Supplementary material for: Insight into the magnetic moment of iron borides: theoretical consideration from the local coordinative and electronic environment
Source: Royal Society of Chemistry journal article supplement (doi:10.1039/c9dt04193a), 2020-01-01
Supplement: c9dt04193a1.pdf [file c9dt04193a1.pdf]

## Electronic supplementary information

# Insight into the Magnetic Moment of Iron Borides: Theoretical Consideration from Local Coordinative and Electronic Environment

Hongliu Wan,<sup>a,c</sup> Xing-Wu Liu,<sup>b</sup> Ming Qing,<sup>\*b</sup> Jin-Jia Liu,<sup>a,c</sup> Yu Zhang,<sup>a,c</sup> Suyao Liu,<sup>b</sup> Hong Wang,<sup>b</sup> Xiao-Dong Wen,<sup>\*a,b</sup> Yong Yang<sup>\*a,b</sup> and Yong-Wang Li<sup>a,b</sup>

<sup>a</sup>State Key Laboratory of Coal Conversion, Institute of Coal Chemistry, Chinese Academy of Sciences, Taiyuan 030001, P.R. China

<sup>b</sup>National Energy Center for Coal to Clean Fuels, Synfuels China Co., Ltd., Huairou District, Beijing 101400, P.R. China

<sup>c</sup>University of Chinese Academy of Sciences, Beijing 100049, P.R. China

### Corresponding Author

Xiao-Dong Wen ([wxd@sxicc.ac.cn](mailto:wxd@sxicc.ac.cn)), Yong Yang ([yong@sxicc.ac.cn](mailto:yong@sxicc.ac.cn)) and Ming Qing ([qingming@synfuelschina.com.cn](mailto:qingming@synfuelschina.com.cn)).

## Contents

|                                                                                               |            |
|-----------------------------------------------------------------------------------------------|------------|
| <b>Table S1.</b> The calculation results with different method.                               | Page S3    |
| <b>Fig. S1.</b> The average numbers of neighbors at different distances in the unit cell.     | Page S4    |
| <b>Fig. S2.</b> The projected Crystal Orbital Hamilton Population analysis of iron borides.   | Page<br>S5 |
| <b>Table S2.</b> The electronic and bonding parameters of iron borides.                       | Page S6    |
| <b>Fig. S3.</b> Correlation between integrated COHP and bader charge.                         | Page S7    |
| <b>Fig. S4.</b> The Fe 3 <i>d</i> orbital energy level of different Fe atoms in iron borides. | Page S8    |
| <b>Table S3.</b> The band gap of FeB <sub>2</sub> that calculated with different functionals. | Page S9    |

**Table S1.** The structure parameters and magnetic moment of iron borides calculated by different method. Among three method, the optimization results obtained by GGA-PBE get closer to the experiment and other DFT results.

| Phases                      | Structure parameters | LDA   | PBE   | PW91  | Exp.                | Other DFT work <sup>a</sup> |
|-----------------------------|----------------------|-------|-------|-------|---------------------|-----------------------------|
| <i>o</i> -Fe <sub>3</sub> B | <i>a</i>             | 5.011 | 5.398 | 5.379 | 5.397 <sup>a</sup>  | 5.393                       |
|                             | <i>b</i>             | 6.485 | 6.652 | 6.638 | 6.648 <sup>a</sup>  | 6.656                       |
|                             | <i>c</i>             | 4.254 | 4.371 | 4.385 | 4.368 <sup>a</sup>  | 4.380                       |
|                             | <i>V</i> /atom       | 8.640 | 9.809 | 9.786 | 9.80 <sup>a</sup>   | 9.826                       |
|                             | $\mu_{\text{Fe}}$    | -0.46 | 2.08  | 2.04  | 1.95 <sup>b</sup>   | 2.08                        |
| <i>t</i> -Fe <sub>3</sub> B | <i>a=b</i>           | 8.202 | 8.547 | 8.537 | 8.674 <sup>c</sup>  | 8.551                       |
|                             | <i>c</i>             | 4.076 | 4.244 | 4.236 | 4.313 <sup>c</sup>  | 4.240                       |
|                             | <i>V</i> /atom       | 8.569 | 9.688 | 9.648 | 10.141 <sup>c</sup> | 9.688                       |
|                             | $\mu_{\text{Fe}}$    | 0.24  | 2.05  | 1.99  | 1.99 <sup>b</sup>   | 2.02                        |
| Fe <sub>2</sub> B           | <i>a=b</i>           | 4.941 | 5.054 | 5.050 | 5.120 <sup>d</sup>  | 5.056                       |
|                             | <i>c</i>             | 4.039 | 4.230 | 4.230 | 4.259 <sup>d</sup>  | 4.232                       |
|                             | <i>V</i> /atom       | 8.217 | 9.004 | 8.990 | 9.304 <sup>d</sup>  | 9.015                       |
|                             | $\mu_{\text{Fe}}$    | 1.12  | 1.91  | 1.86  | 1.95 <sup>e</sup>   | 1.90                        |
| FeB                         | <i>a</i>             | 5.225 | 5.407 | 5.405 | 5.495 <sup>d</sup>  | 5.413                       |
|                             | <i>b</i>             | 2.935 | 2.944 | 2.950 | 2.941 <sup>d</sup>  | 2.948                       |
|                             | <i>c</i>             | 3.924 | 3.994 | 3.992 | 4.048 <sup>d</sup>  | 3.998                       |
|                             | <i>V</i> /atom       | 7.522 | 7.947 | 7.956 | 8.177 <sup>d</sup>  | 7.975                       |
|                             | $\mu_{\text{Fe}}$    | 1.06  | 1.22  | 1.20  | 1.26 <sup>e</sup>   | 1.25                        |
| FeB <sub>2</sub>            | <i>a</i>             | 4.744 | 4.813 | 4.817 | 4.819 <sup>a</sup>  | 4.816                       |
|                             | <i>b</i>             | 4.738 | 4.805 | 4.798 | 4.807 <sup>a</sup>  | 4.807                       |
|                             | <i>c</i>             | 3.675 | 3.738 | 3.744 | 3.742 <sup>a</sup>  | 3.740                       |
|                             | <i>V</i> /atom       | 6.884 | 7.204 | 7.211 | 7.220 <sup>a</sup>  | 7.215                       |
|                             | $\mu_{\text{Fe}}$    | 0.00  | 0.00  | 0.00  | 0.00 <sup>f</sup>   | 0.00                        |
| FeB <sub>4</sub>            | <i>a</i>             | 4.439 | 4.521 | 4.523 | 4.579 <sup>g</sup>  | 4.521                       |
|                             | <i>b</i>             | 5.223 | 5.284 | 5.274 | 5.298 <sup>g</sup>  | 5.284                       |
|                             | <i>c</i>             | 2.965 | 3.006 | 3.005 | 3.000 <sup>g</sup>  | 3.006                       |
|                             | <i>V</i> /atom       | 6.874 | 7.181 | 7.168 | 7.275 <sup>g</sup>  | 7.181                       |
|                             | $\mu_{\text{Fe}}$    | 0.00  | 0.00  | 0.00  | 0.00 <sup>f</sup>   | 0.00                        |

<sup>a</sup>reference<sup>1</sup> <sup>b</sup>reference<sup>2</sup> <sup>c</sup>reference<sup>3</sup> <sup>d</sup>reference<sup>4</sup> <sup>e</sup>reference<sup>5</sup> <sup>f</sup>reference<sup>6</sup> <sup>g</sup>reference<sup>7</sup>

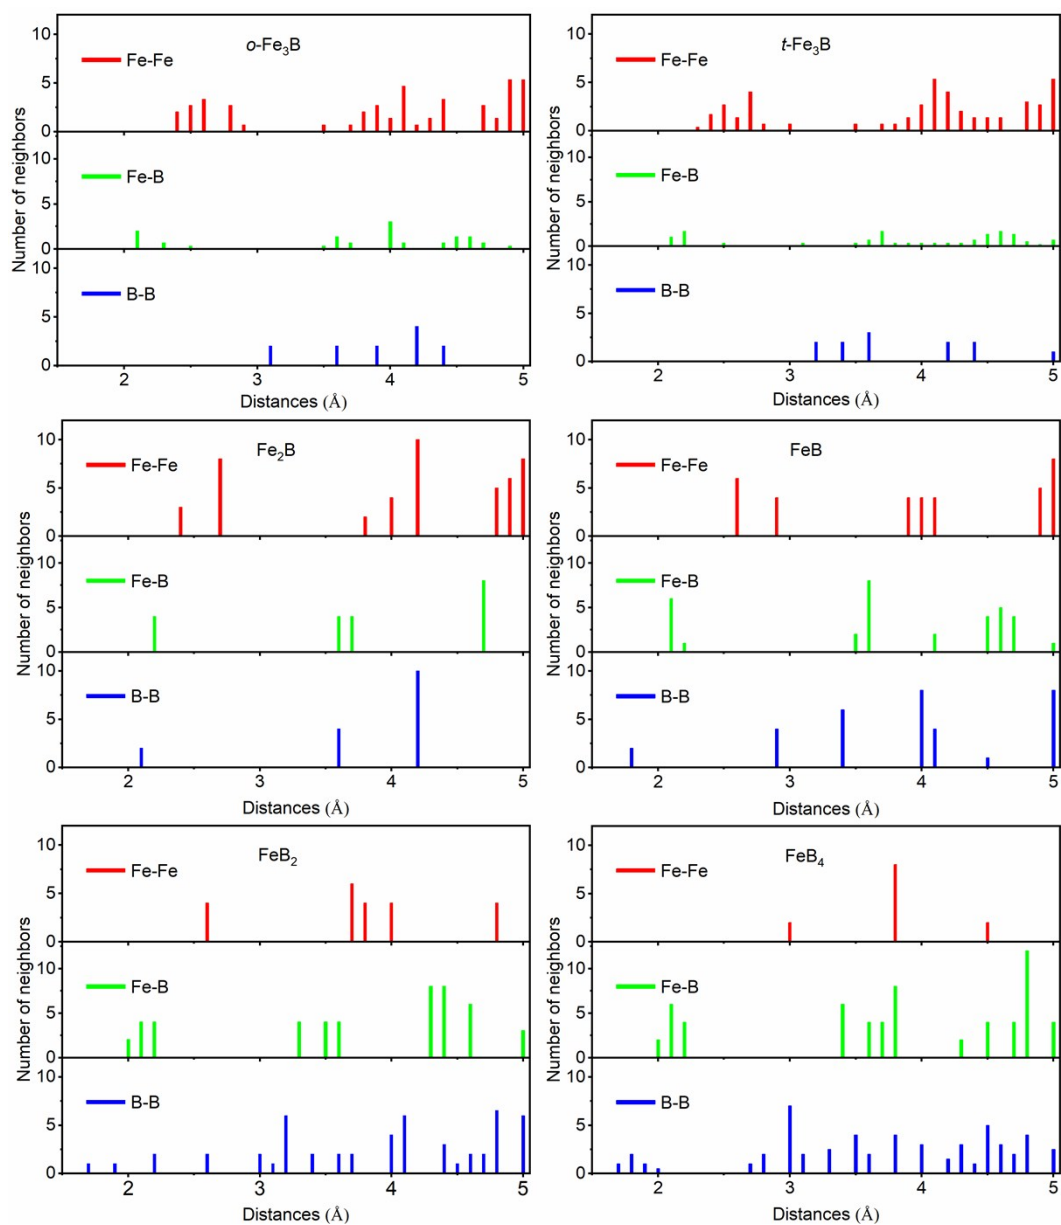

**Fig. S1.** The average number of neighbors at different distances in the unit cell.

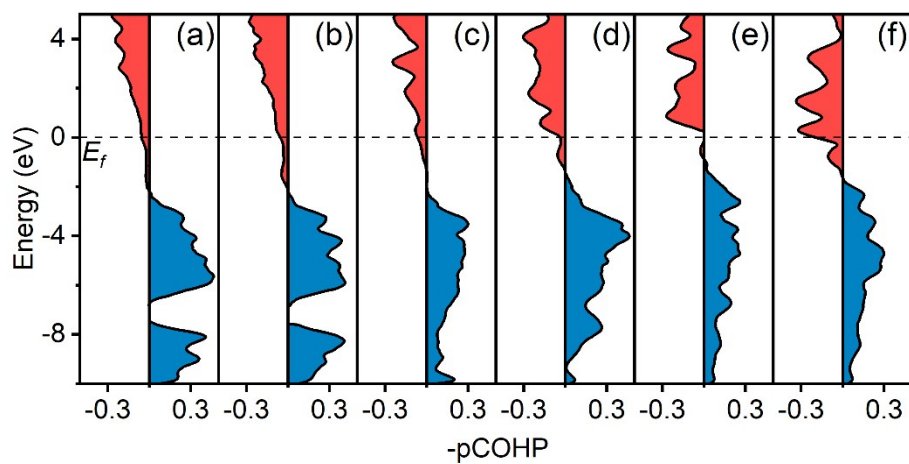

**Fig. S2.** The projected Crystal Orbital Hamilton Population analysis of Fe-B bonds in (a) *o*-Fe<sub>3</sub>B (b) *t*-Fe<sub>3</sub>B (c) Fe<sub>2</sub>B (d) FeB (e) FeB<sub>2</sub> (f) FeB<sub>4</sub>. Red and blue fill region represent the anti-bonding and bonding contribution, respectively. Dash line represent the Fermi level which is set to zero.

**Table S2.** The electronic and bonding parameters of iron borides.  $\Delta q$  and ICOHP

represent the net charge and integral COHP of Fe atoms.

| Iron boride                 | B/Fe ratio | Central Fe | $\Delta q$ (e) | ICOHP |
|-----------------------------|------------|------------|----------------|-------|
| $\alpha$ -Fe                | -          | Fe1        | 0.00           | -     |
| <i>o</i> -Fe <sub>3</sub> B | 0.33       | Fe1        | -0.34          | -1.26 |
|                             |            | Fe2        | -0.21          | -0.53 |
|                             |            | Fe1        | -0.18          | -0.34 |
| <i>t</i> -Fe <sub>3</sub> B | 0.33       | Fe2        | -0.29          | -0.52 |
|                             |            | Fe3        | -0.19          | -0.52 |
|                             |            | Fe1        | -0.28          | -0.97 |
| Fe <sub>2</sub> B           | 0.50       | Fe1        | -0.28          | -0.97 |
| FeB                         | 1.00       | Fe1        | -0.42          | -1.66 |
| FeB <sub>2</sub>            | 2.00       | Fe1        | -0.24          | -1.07 |
| FeB <sub>4</sub>            | 4.00       | Fe1        | -0.43          | -1.34 |

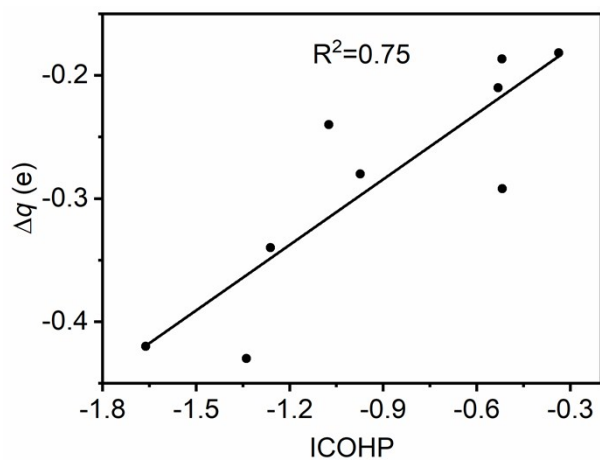

**Fig. S3.** Correlation between integrated COHP (ICOHP) and bader charge.

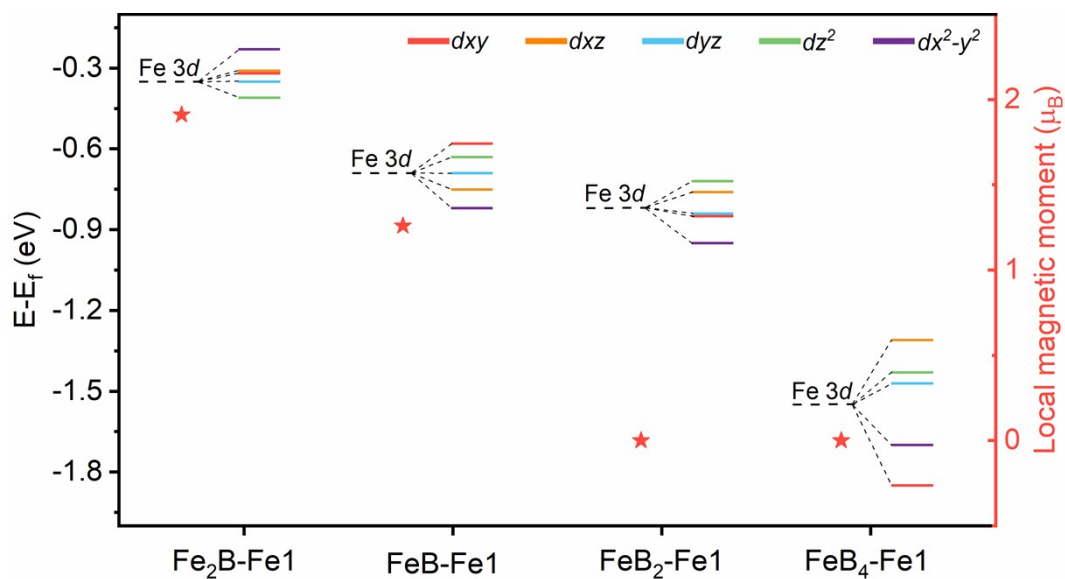

**Fig.S4.** The Fe 3d orbital energy level and local magnetic moments of different Fe atoms in iron borides. Red marks represent local magnetic moment of relevant Fe atoms.



**Table S3** The band gap of FeB<sub>2</sub> that calculated with different functionals.

| Functionals      | PBE         | PBE+U       |             |             |             | HSE06 | PBE                                             |
|------------------|-------------|-------------|-------------|-------------|-------------|-------|-------------------------------------------------|
|                  | (This work) | U = 2<br>eV | U = 3<br>eV | U = 4<br>eV | U = 5<br>eV |       | (Phys. Rev. Lett. <b>2010</b> ,<br>105, 217003) |
| Band gap<br>(eV) | 0.45        | 0.53        | 0.59        | 0.65        | 0.65        | 1.03  | ~0.5                                            |

## References

- 1 L.-H. Li, W.-L. Wang, L. Hu and B.-B. Wei, *Intermetallics*, 2014, **46**, 211-221.
- 2 Y. Kong and F. Li, *Phys. Rev. B*, 1997, **56**, 3153-3158.
- 3 Y. Li and R. P. Chang, *J. Am. Chem. Soc.*, 2006, **128**, 12778-12784.
- 4 C. Kapfenberger, B. Albert, R. Pottgen and H. Huppertz, *Z. Kristallogr.*, 2006, **221**, 477-481.
- 5 W. Y. Ching, Y.-N. Xu, B. N. Harmon, J. Ye and T. C. Leung, *Phy. Rev. B*, 1990, **42**, 4460-4470.
- 6 A. N. Kolmogorov, S. Shah, E. R. Margine, A. F. Bialon, T. Hammerschmidt and R. Drautz, *Phys. Rev. Lett.*, 2010, **105**, 217003.
- 7 H. Gou, N. Dubrovinskaia, E. Bykova, A. A. Tsirlin, D. Kasinathan, W. Schnelle, A. Richter, M. Merlini, M. Hanfland, A. M. Abakumov, D. Batuk, G. Van Tendeloo, Y. Nakajima, A. N. Kolmogorov and L. Dubrovinsky, *Phys. Rev. Lett.*, 2013, **111**, 157002.
